# Supplementary material for: Exploration of the Modulatory Property Mechanism of ELeng Capsule in the Treatment of Endometriosis Using Transcriptomics Combined With Systems Network Pharmacology
Source: Front Pharmacol. 2021 Jun 18;12:674874. doi: 10.3389/fphar.2021.674874 (PMC8249582; doi:10.3389/fphar.2021.674874)
Supplement: Supplementary file 16 [file Table5.XLSX]

## Sheet: Sheet1
Table S5:The major compouds and targets of ELeng Capsules.
Molecule Name	Targets
γ-elemene	PTGS1
γ-elemene	PTGS2
γ-elemene	CHRM3
γ-elemene	GABRA2
γ-elemene	RXRA
γ-elemene	NET
γ-elemene	ADRA1A
γ-elemene	CHRM2
γ-elemene	GABRA1
γ-elemene	GABRA6
Zederone	NOS2
Zederone	CHRM3
Zederone	F2
Zederone	CHRM1
Zederone	ADRB2
Zederone	GABRA1
Zederone	CHRNA7
Tanshinone IIA	EDN1
Tanshinone IIA	ACHE
Tanshinone IIA	ADRA1A
Tanshinone IIA	ADRB1
Tanshinone IIA	ADRB2
Tanshinone IIA	AHSA1
Tanshinone IIA	BCL2
Tanshinone IIA	CASP3
Tanshinone IIA	CDKN3
Tanshinone IIA	CHRM1
Tanshinone IIA	F2
Tanshinone IIA	FASN
Tanshinone IIA	FOS
Tanshinone IIA	OPRM1
Tanshinone IIA	TP53
Tanshinone IIA	DRD1
Tanshinone IIA	CHRM3
Tanshinone IIA	CHRM5
Tanshinone IIA	PTGS2
Tanshinone IIA	CHRM4
Tanshinone IIA	OPRD1
Tanshinone IIA	CHRM2
Tanshinone IIA	DPP4
Tanshinone IIA	CHRNA7
Tanshinone IIA	RXRA
Tanshinone IIA	NFKB3
Tanshinone IIA	MMP9
Tanshinone IIA	JUN
Tanshinone IIA	IKBKG
Tanshinone IIA	EDNRA
Tanshinone IIA	CYP3A4
Tanshinone IIA	CYP1A2
Tanshinone IIA	MYC
Tanshinone IIA	CYP1A1
Tanshinone IIA	NR1I2
Tanshinone IIA	NPM1
Tanshinone IIA	ECE1
Tanshinone IIA	PARP4
Tanshinone IIA	CALCRL
Tanshinone IIA	ITGB3
Tanshinone IIA	MMP2
Tanshinone IIA	PTPN3
Tanshinone IIA	ATF3
Tanshinone IIA	CCND1
Tanshinone I	F2
Tanshinone I	AR
Tanshinone I	PTGS2
Tanshinone I	RXRA
Tanshinone I	DPP4
Tanshinone I	HSP90AB1
Tanshinone I	PIK3CG
Tanshinone I	PRSS1
Tanshinone I	VEGFA
Tanshinone I	ICAM1
Tanshinone I	VCAM1
Tanshinone	CYP1A1
Tanshinone	CYP1A2
Tanshinone	NOS3
Tanshinone	CYP2C19
Tanshinone	TMPRSS11D
Tanshinone	CCND1
Tanshinone	CYP2C9
Tanshinone	CASP3
Tanshinone	CYP1B1
Salvianolic acid	F10
Salvianolic acid	F7
Salvianolic acid	PTPN6
Salvianolic acid	PRSS1
Salvianolic acid	AKT1
Salvianolic acid	CCND1
Salvianolic acid	BCL2
Salvianolic acid	CDKN3
Salvianolic acid	EIF3L
Salvianolic acid	CASP3
Salvianolic acid	COL7A1
Salvianolic acid	CCL20
Rosmarinic acid	F2
Rosmarinic acid	ESR1
Rosmarinic acid	AR
Rosmarinic acid	PPARG
Rosmarinic acid	PTGS2
Rosmarinic acid	DPP4
Rosmarinic acid	PRSS1
Rosmarinic acid	NFKB3
Rosmarinic acid	IKBKB
Rosmarinic acid	CDKN3
Rosmarinic acid	EIF3L
Rosmarinic acid	MAPK1
Rosmarinic acid	CASP3
Rosmarinic acid	STAT1
Rosmarinic acid	CCL13
Rosmarinic acid	MGAM
Rosmarinic acid	IL2
Rosmarinic acid	NFATC3
Rosmarinic acid	CCND3
Rosmarinic acid	IL4R
Rosmarinic acid	IL5
Rosmarinic acid	CCL3
Rosmarinic acid	CD80
Rosmarinic acid	CD86
Rosmarinic acid	CCL11
Rosmarinic acid	CCR6
Rosmarinic acid	IDO1
Rosmarinic acid	SNCA
Rosmarinic acid	IGHG1
Rosmarinic acid	C3
Rosmarinic acid	C5
Palmitic acid	CTSD
Palmitic acid	ADH1B
Palmitic acid	ADH1C
Palmitic acid	PTGS1
Palmitic acid	PTGS2
Palmitic acid	RHO
Palmitic acid	IGHG1
Palmitic acid	NCOA2
Palmitic acid	BCL2
Palmitic acid	IL10
Palmitic acid	TNF
Palmitic acid	COL1A1
Palmitic acid	PTEN
Palmitic acid	GUSBP1
Palmitic acid	SLC22A5
Palmitic acid	PCYT1A
Palmitate	CPT1A
Palmitate	CPT2
Palmitate	TRAPPC3
Palmitate	ACACA
Palmitate	PPARA
Palmitate	GCG
Palmitate	NOS3
Palmitate	PPT1
Palmitate	APOB
Palmitate	FABP4
Paeoniflorin	TNF
Paeoniflorin	IL6
Paeoniflorin	CD14
Paeoniflorin	LBP
Paeoniflorin	TLR4
Paeoniflorin	HSF1
Paeoniflorin	IL8
Neoeriocitrin	TOP2A
Narirutin	TOP2A
Naringin	TOP2A
Naringin	CDKN3
Naringin	TNF
Naringin	RASGRF1
Naringin	RAF1
Naringin	PPARA
Naringin	DPP4
Naringin	PPARG
Naringin	AKT1
Naringin	NQO1
Naringin	MMP9
Naringin	BMP2
Naringin	CCK
Naringin	GHSR
Naringin	IL8
Linolenic acid	PTGS1
Linolenic acid	PTGS2
Linolenic acid	NCOA2
Linolenic acid	O3FAR1
Linolenic acid	FADS2
Linolenic acid	FADS1
Linolenic acid	PPARA
Linolenic acid	PPARG
Linolenic acid	CD36
Linolenic acid	PLA2G6
Linolenic acid	PLA2G2A
Linolenic acid	PLA2G1B
Linolenic acid	PNPLA8
Linoleic acid	PTGS1
Linoleic acid	PTGS2
Linoleic acid	RXRA
Linoleic acid	NCOA2
Linoleic acid	E
Linoleic acid	NET
Linoleic acid	IGHG1
Linoleic acid	GABRA2
Linoleic acid	GABRA1
Linoleic acid	CYP2C8
Linoleic acid	TRPM5
Linoleic acid	CHRM1
Linoleic acid	CHRM2
Linoleic acid	GABRA6
Linoleic acid	PPARA
Linoleic acid	FABP4
Linoleic acid	ANGPTL4
Linoleic acid	APOA1
Linoleic acid	PPARGC1A
Linoleic acid	ACSL4
Linoleic acid	SDC4
Linoleic acid	ALOX15
Linoleic acid	ALOX15B
Linoleic acid	FADS2
Limonin	CYP3A4
Isoborneol	GABRA6
Isoborneol	PGR
Isoborneol	CYP2C8
Isoborneol	GABRA2
Isoborneol	CHRM2
Isoborneol	GABRA1
Isoborneol	CHRM3
Isoborneol	CHRM1
Isoborneol	PTGS2
Isoborneol	GABRA5
Isoborneol	NET
Isoborneol	ADRA1A
Hesperetin	PTGS1
Hesperetin	ADRB1
Hesperetin	PTGS2
Hesperetin	HSP90AB1
Hesperetin	PIK3CG
Hesperetin	PRKACA
Hesperetin	NCOA2
Hesperetin	CAMTA3
Hesperetin	CYP71B35
Hesperetin	TAG1
Hesperetin	AT4G35090
Hesperetin	CAT1
Hesperetin	AT1G20620
Hesperetin	RHC1A
Hesperetin	CYP86A8
Hesperetin	CYP86A2
Hesperetin	CYP86A7
Germacra	PTGS2
Germacra	RXRA
Germacra	NET
Germacra	GABRA1
Germacra	MAOB
Gallic acid	PTGS1
Gallic acid	PTGS2
Gallic acid	MAOB
Gallic acid	PGR
Gallic acid	PTPN6
Gallic acid	TOP2A
Gallic acid	HSP90AB1
Gallic acid	PIK3CG
Gallic acid	CASP9
Gallic acid	CASP3
Gallic acid	TP53
Gallic acid	FASN FAS
Gallic acid	FASLG
Gallic acid	MGST1
Gallic acid	CYP3A43
Gallic acid	MMP2
Gallic acid	TYR
Gallic acid	ATM
Gallic acid	ABCB1
Gallic acid	JUN
Gallic acid	UGT2B17
Gallic acid	SERPINE1
Gallic acid	GATA3
Gallic acid	EIF2AK3
Eucalyptol	NOS3
Eucalyptol	GABRA2
Eucalyptol	GABRA1
Eucalyptol	CYP2C8
Eucalyptol	PTGS2
Eucalyptol	GABRA5
Eucalyptol	ADH1B
Eucalyptol	ADH1C
Eucalyptol	CHRNA2
Eucalyptol	PRODH2
Elemene	CASP3
Danshensu	ACHE
Danshensu	ACTB
Danshensu	ADRA1D
Danshensu	ADRA2A
Danshensu	ADRA2B
Danshensu	ADRA2C
Danshensu	ADRB1
Danshensu	ADRB2
Danshensu	COL1A1
Danshensu	COL3A1
Danshensu	F2
Danshensu	TGFB1
Danshensu	HMOX1
Danshensu	PLAU
Curdione	CYP3A4
Cryptotanshinone	ADRA1A
Cryptotanshinone	ADRA1B
Cryptotanshinone	ADRA1D
Cryptotanshinone	ADRB1
Cryptotanshinone	ADRB2
Cryptotanshinone	APP
Cryptotanshinone	BCL2L1
Cryptotanshinone	BIRC5
Cryptotanshinone	CHRM1
Cryptotanshinone	CHRM3
Cryptotanshinone	CHRM4
Cryptotanshinone	CHRNA7
Cryptotanshinone	PTGS1
Cryptotanshinone	DRD1
Cryptotanshinone	CHRM5
Cryptotanshinone	PTGS2
Cryptotanshinone	CA2
Cryptotanshinone	OPRD1
Cryptotanshinone	CHRM2
Cryptotanshinone	TOP2A
Cryptotanshinone	OPRM1
Cryptotanshinone	NCOA2
Cryptotanshinone	PGR
Cryptotanshinone	GABRA1
Cryptotanshinone	NFKB3
Cryptotanshinone	STAT1
Cryptotanshinone	CCND1
Cryptotanshinone	TNF
Cryptotanshinone	EDN1
Cholic acid	NR3C2
Cholic acid	NCOA2
Cholic acid	FABP6
Cholic acid	CYP7A1
Cholic acid	FECH
Cholic acid	GPBAR1
Cholic acid	MT-CO3
Cholic acid	MT-CO1
Cholic acid	CES1
Cholic acid	ESRRG
Borneol	CYP2C8
Borneol	GABRA2
Borneol	GABRA5
Borneol	CHRM2
Borneol	GABRA1
Borneol	IGHG1
Borneol	GABRA6
Borneol	PTGS1
Borneol	PTGS2
Borneol	NET
